# Supplementary material
Source: PubMed Central journal article supplement (PMC9898175)
Supplement: NIHMS1857023-supplement-1.pdf [file NIHMS1857023-supplement-1.pdf]

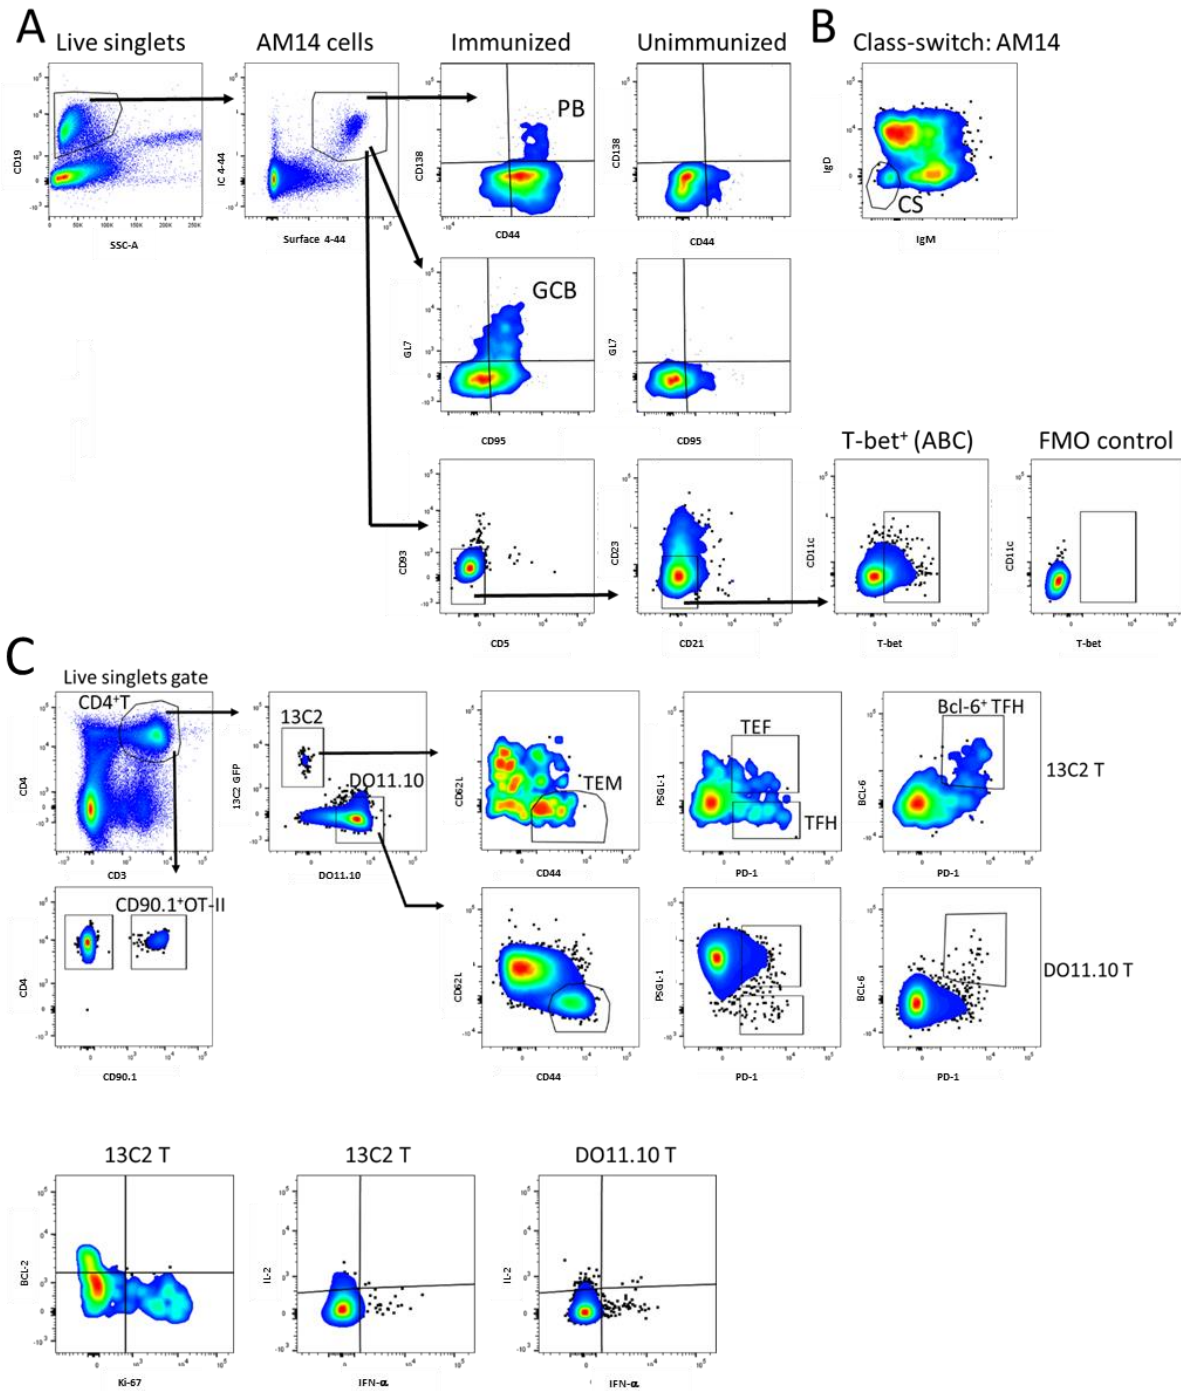

**Supplemental Figure 1. Gating strategy.** **A.** Gating of surface 4-44<sup>+</sup> intracellular 4-44<sup>+</sup> CD19<sup>+</sup> AM14 B cells, CD138<sup>+</sup>CD44<sup>+</sup> PBs and FAS<sup>+</sup>GL7<sup>+</sup> GC AM14 B cells in immunized and unimmunized mice, as well as ABC gating strategy (CD5<sup>lo</sup>CD93<sup>lo</sup>CD21<sup>lo</sup>CD23<sup>lo</sup>T-bet<sup>+</sup>CD11c<sup>+/−</sup>). **B.** Gating of IgM<sup>+</sup>IgD<sup>−</sup> CS AM14 B cells. **C.** CD4<sup>+</sup> T cell gating identifying GFP<sup>+</sup> 13C2 T cells and KJ1-26 DO11.10 T cells, further gated as CD44<sup>+</sup>CD62L<sup>−</sup> Tem, PD-1<sup>+</sup>PSGL-1<sup>lo</sup> Tfh, PD-1<sup>+</sup>PSGL-1<sup>+</sup> Tef, and BCL-6<sup>+</sup>PD-1<sup>+</sup> Tfh cells. The expression of KI-67, BCL-2, and IL-2 were also assessed in these cells.

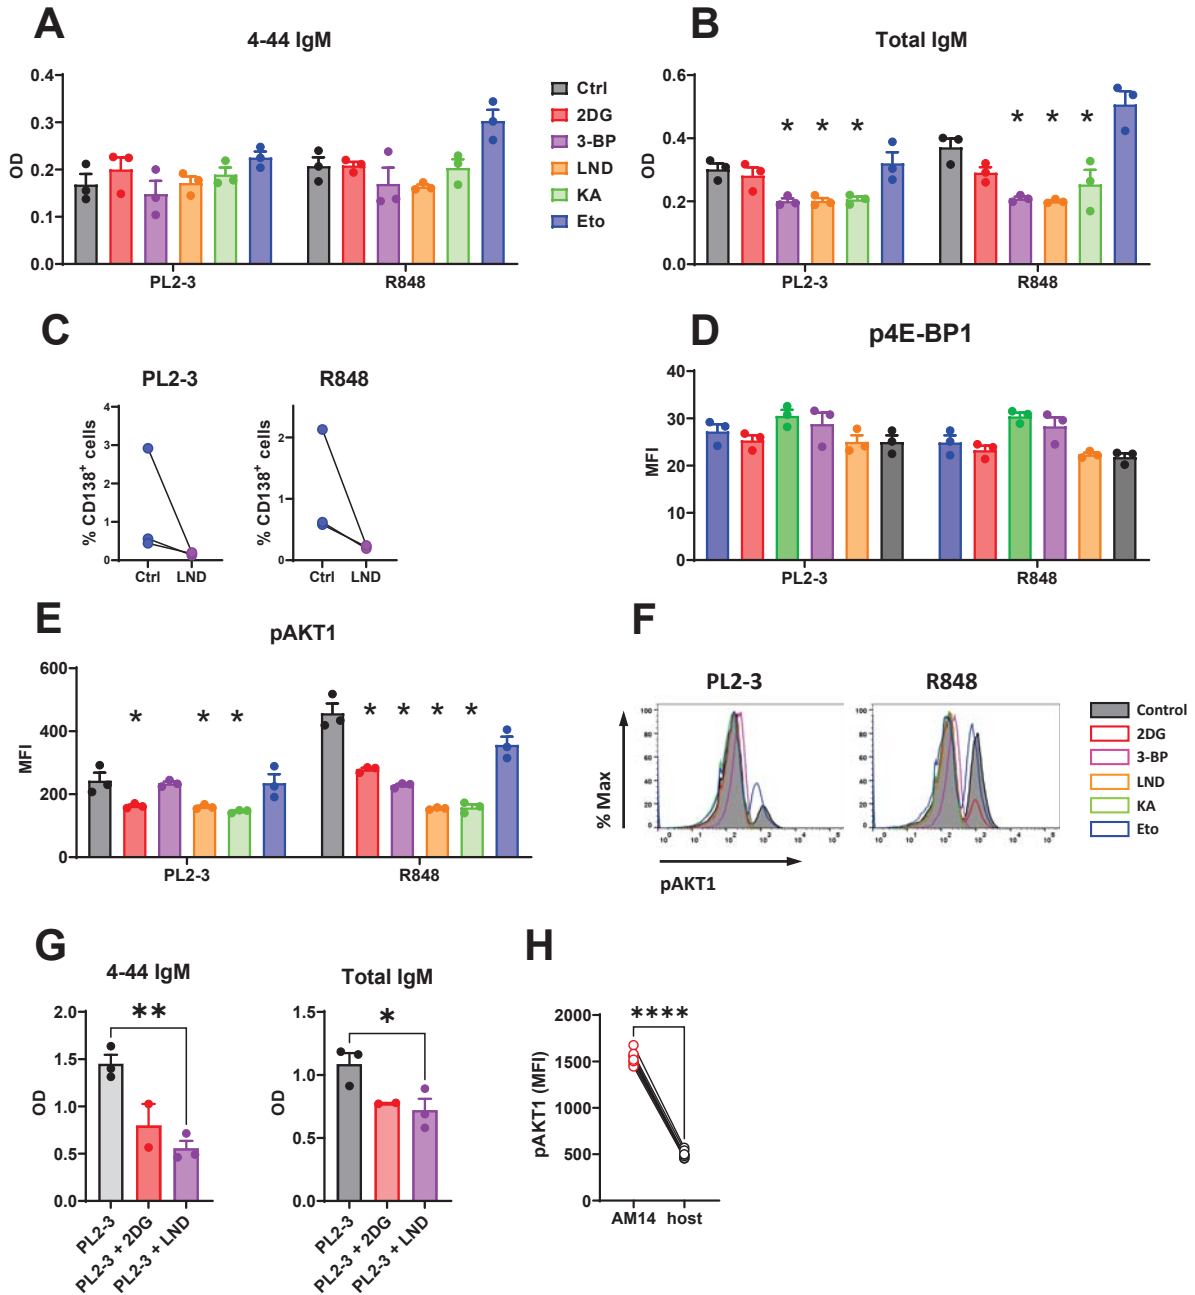

**Supplemental Figure 2. Multiple glycolysis inhibitors impair the antibody production from AM14 B cells.** **A – F.** Purified AM14 B cells were stimulated with PL2-3 or R848, without inhibitors (Ctrl), 2DG, bromopyruvate (3-BP), lanodamine (LND), koningic acid (KA) or etomoxir (Eto). Quantification of 4-44 IgM (**A**) and total IgM (**B**) in the supernatant. **C.** Frequency of CD138<sup>+</sup> plasmablasts. **D.** p4E-BP1 expression. **E.** pAKT1 (Ser 473) expression with representative FACS plots. **G-H.** AM14 B cells were transferred into BALB/c mice that were immunized with PL2-3 and treated with 2DG or LND. **G.** Serum 4-44 IgM and total IgM. **H.** pAKT1 expression in AM14 B cells relative to the host polyclonal B cells. Statistical significance is indicated for paired t tests relative to controls. \*P < 0.05; \*\*P < 0.01, \*\*\*\*P < 0.0001.

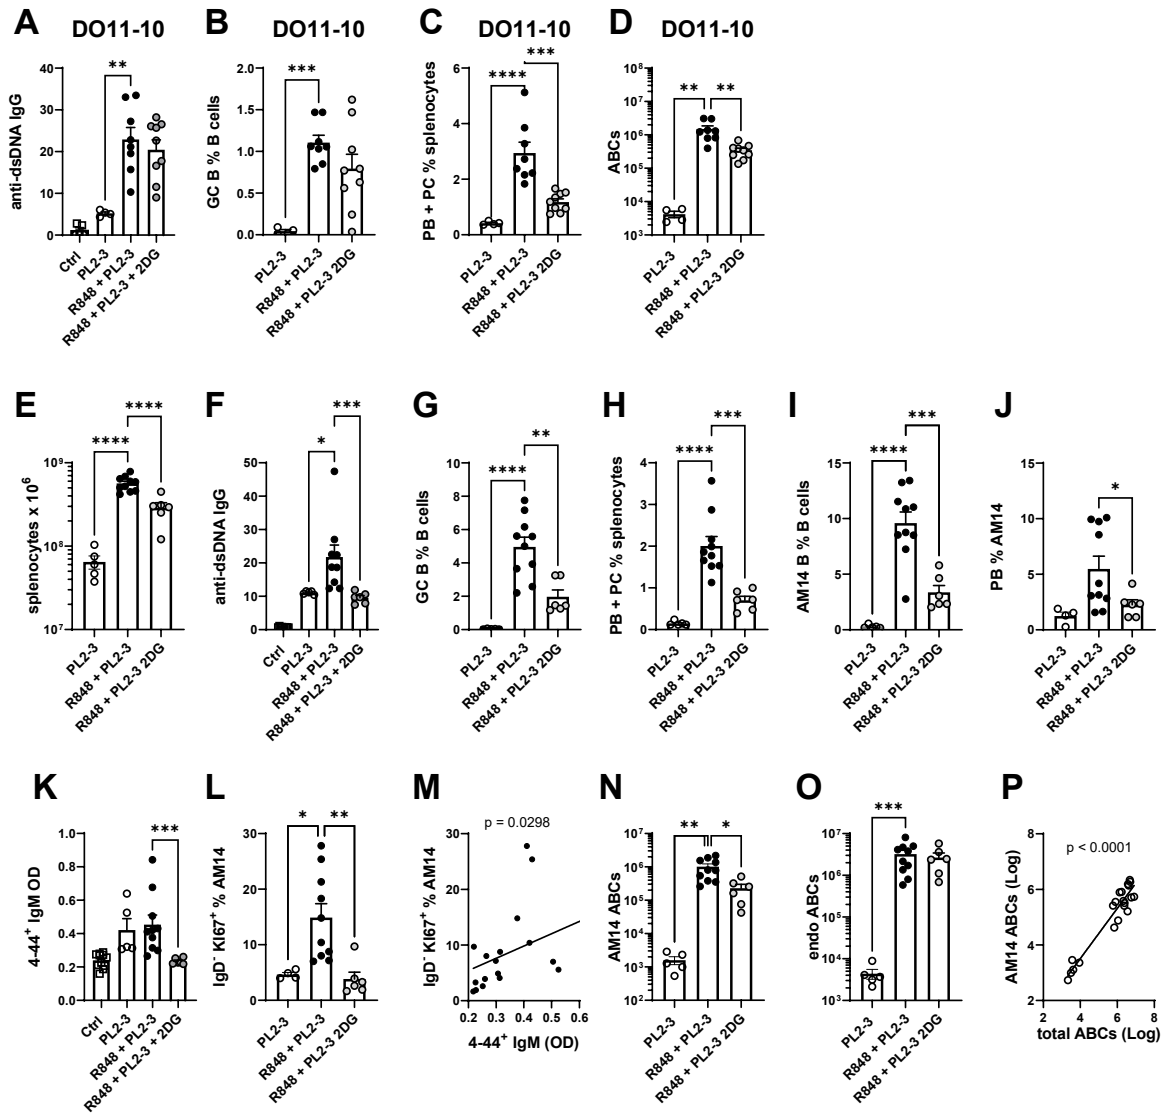

**Supplemental Figure 3. The inhibition of glycolysis impairs the cognate activation of TLR7 stimulated AM14 B cells.** AM14 B cells were transferred into DO11-10 (A-D) or BALB/c (E-P) mice immunized with PL2-3. Some recipients were pre-treated with R848, then treated or not with 2DG starting with PL2-3 immunization. Control (Ctrl) were untouched mice from the recipient strain. **A.** Serum anti-dsDNA IgG. Frequency of endogenous (non-AM14) GC B cells (**B**) and PB + PC (**C**). **D.** Number of endogenous ABCs. **E.** Absolute numbers of splenocytes. **F.** Serum anti-dsDNA IgG. Frequency of endogenous GC B cells (**G**) and PB + PC (**H**). **I.** AM14 B cell frequency among total B cells. **J.** Frequency of AM14 PBs. **K.** Serum 4-44<sup>+</sup> IgM. **L.** Frequency of IgD<sup>low</sup>Ki-67<sup>+</sup> cells among AM14 B cells. **M.** Correlation between the frequency of IgD<sup>low</sup>Ki-67<sup>+</sup> AM14 B cells and 4-44<sup>+</sup> IgM serum levels. **N.** Absolute numbers of AM14 ABCs. **O.** Absolute numbers of endogenous ABCs **P.** Correlation between the numbers of AM14 ABCs and total ABCs. Data were pooled from 2 experiments for each type of recipients. Each point represents a mouse. The statistics correspond to 1-way ANOVA with multiple comparison tests or to Pearson's tests (**F** and **I**). \*P < 0.05; \*\*P < 0.01. \*\*\*P < 0.001, \*\*\*\*P < 0.001.
